# Supplementary material for: Oxytocin and vasopressin flatten dominance hierarchy and enhance behavioral synchrony in part via anterior cingulate cortex
Source: PubMed Central journal article supplement (PMC5974023; doi:10.1038/s41598-018-25607-1), 2018-05-29

## Title

Oxytocin and vasopressin flatten dominance hierarchy and enhance behavioral synchrony in part via anterior cingulate cortex

## Authors

Yaoguang Jiang, Michael L. Platt

## Supplementary Figure Legends

**Figure S1:** Additional example ethograms and relationships between various quantifiable behaviors. **A:** Example sets of ethograms for the same monkey pair (M1: H; M2: E) facing each other in 4 saline sessions. **B:** Across the population, M1 staring and M1 looking away are negatively correlated ( $r = -0.41$ ,  $df = 82$ ,  $P = 0.000$ ). **C:** M1 staring and turning away are also negatively correlated ( $r = -0.35$ ,  $df = 82$ ,  $P = 0.001$ ). **D:** M1 staring and M2 staring are negatively correlated ( $r = -0.38$ ,  $df = 82$ ,  $P = 0.000$ ).

**Figure S2:** Effects of OT inhalation on behavior. **A:** OT reduces staring by highly dominant M1s (low dominance M1, saline =  $38.62 \pm 3.49$  s; OT =  $40.04 \pm 4.95$  s; middle dominance M1, saline =  $61.60 \pm 1.39$  s; OT =  $64.88 \pm 4.65$  s; high dominance M1, saline =  $114.73 \pm 8.63$  s; OT =  $92.57 \pm 8.87$  s;  $df = 13$ ,  $P = 0.030$ , Wilcoxon signed rank test on high dominance M1s). Error bars: mean  $\pm$  SEM; dominance measured by average staring durations under saline. **B:** OT reduces staring by highly dominant M2s (low dominance M2, saline =  $15.35 \pm 1.45$  s; OT =  $18.54 \pm 3.51$  s; middle dominance M2, saline =  $30.67 \pm 1.50$  s; OT =  $25.43 \pm 3.39$  s; high dominance M2, saline =  $63.83 \pm 7.11$  s; OT =  $39.81 \pm 5.14$  s;  $df = 13$ ,  $P = 0.000$ , Wilcoxon signed rank test on high dominance M2s). Error bars: mean  $\pm$  SEM; dominance measured by average staring durations under saline. **C:** OT treatment does not change yawning or threats by M1, compared with saline (M1 number of yawns, saline =  $2.47 \pm 0.24$  / session; OT =  $2.69 \pm 0.24$  / session;  $df = 358$ ,  $P = 0.146$ , Wilcoxon rank sum test; M1 number of threats, saline =  $1.74 \pm 0.39$  / session; OT =  $2.02 \pm 0.40$  / session;  $df = 358$ ,  $P = 0.371$ , Wilcoxon rank sum test). **D:** OT treatment increases the cross correlation between M2 staring and M1 turning away (the same as Figure 3D but plotted on a finer time scale). Error bars: mean  $\pm$  SEM. **E:** OT treatment increases the cross correlation between M1 and M2 staring (the same as Figure 3E but drawn on a finer time scale). Error bars: mean  $\pm$  SEM. **F:** OT treatment does not alter the cross correlation between M1 staring and M2 turning away (the same as Figure 3F but plotted on a finer time scale). Error bars: mean  $\pm$  SEM.

**Figure S3:** Effects of OT and AVP inhalation on behavior. **A:** OT and AVP reduce staring by dominant M1s (low dominance M1, saline =  $18.40 \pm 2.98$  s; OT =  $12.78 \pm 4.29$  s; AVP =  $8.93 \pm 2.04$  s; high dominance M1, saline =  $66.56 \pm 9.33$  s; OT =  $40.94 \pm 6.32$  s; AVP =  $35.36 \pm 7.91$  s;  $F(2, 24) = 2.16$ ,  $P = 0.137$ , 1-way ANOVA on low dominance M1;  $F(2, 24) = 4.38$ ,  $P = 0.024$ , 1-way ANOVA on high dominance M1;  $P = 0.078$ , multiple comparison, high dominance saline vs OT;  $P = 0.027$ , multiple comparison, high

dominance saline vs AVP). Error bars: mean  $\pm$  SEM; dominance measured by average staring durations under saline. **B:** AVP but not OT reduces staring by dominant M2s (low dominance M2, saline =  $18.49 \pm 3.06$  s; OT =  $19.56 \pm 2.41$  s; AVP =  $12.73 \pm 2.98$  s; high dominance M2, saline =  $51.21 \pm 7.39$  s; OT =  $43.11 \pm 5.64$  s; AVP =  $25.72 \pm 5.05$  s;  $F(2, 24) = 1.68$ ,  $P = 0.207$ , 1-way ANOVA on low dominance M2;  $F(2, 24) = 4.55$ ,  $P = 0.021$ , 1-way ANOVA on high dominance M2;  $P = 0.622$ , multiple comparison, high dominance saline vs OT;  $P = 0.018$ , multiple comparison, high dominance saline vs AVP). Error bars: mean  $\pm$  SEM; dominance measured by average staring durations under saline. **C:** OT and AVP increase the cross correlation between M1 and M2 staring (the same as Figure 4D but plotted on a finer time scale). Error bars: mean  $\pm$  SEM. **D:** The auto correlation of M1 staring does not vary with OT or AVP. Thickness of the curves indicates mean  $\pm$  SEM.

**Figure S4:** Effects of OT and AVP injections in ACCg. **A:** For a different population of M1s (C, O, S;  $n = 60$  face-off sessions \* 2 treatment conditions), OT injections into ACCg insignificantly reduce staring by M1 (M1 saline =  $37.77 \pm 3.15$  s; OT =  $32.47 \pm 3.33$  s;  $df = 118$ ,  $P = 0.132$ , Wilcoxon rank sum test). Black line: gamma fit of saline distribution; magenta line: gamma fit of OT distribution. **B:** For the same population, OT injections into ACCg significantly reduce staring by M2 (M2 saline =  $34.70 \pm 3.94$  s, OT =  $25.44 \pm 3.66$  s;  $df = 118$ ,  $P = 0.038$ , Wilcoxon rank sum test). Black line: gamma fit of saline distribution; magenta line: gamma fit of OT distribution. **Insert:** Compared with saline (grey), OT (pink) does not change M1 staring at an empty chair. Error bars: mean  $\pm$  SEM. **C:** OT and AVP injections into ACCg reduce staring by M1 regardless of dominance order (low dominance M1, saline =  $21.99 \pm 6.20$  s; OT =  $7.73 \pm 3.18$  s; AVP =  $6.25 \pm 1.92$  s; high dominance M1, saline =  $73.73 \pm 7.49$  s; OT =  $21.49 \pm 3.69$  s; AVP =  $21.31 \pm 3.52$  s;  $F(2, 15) = 4.34$ ,  $P = 0.033$ , 1-way ANOVA on low dominance M1;  $P = 0.070$ , multiple comparison, low dominance saline vs OT;  $P = 0.044$ , multiple comparison, low dominance saline vs AVP;  $F(2, 15) = 33.31$ ,  $P = 0.000$ , 1-way ANOVA on high dominance M1;  $P = 0.000$ , multiple comparison, high dominance saline vs OT;  $P = 0.000$ , multiple comparison, high dominance saline vs AVP). Error bars: mean  $\pm$  SEM; dominance measured by average staring durations under saline. **D:** OT and AVP injections into ACCg reduce staring by dominant but not subordinate M2s (low dominance M2, saline =  $22.29 \pm 5.43$  s; OT =  $16.72 \pm 4.06$  s; AVP =  $14.00 \pm 3.30$  s; high dominance M2, saline =  $57.56 \pm 5.46$  s; OT =  $36.59 \pm 5.79$  s; AVP =  $27.94 \pm 4.23$  s;  $F(2, 15) = 0.94$ ,  $P = 0.411$ , 1-way ANOVA on low dominance M2;  $F(2, 15) = 8.57$ ,  $P = 0.003$ , 1-way ANOVA on high dominance M2;  $P = 0.031$ , multiple comparison, high dominance saline vs OT;  $P = 0.003$ , multiple comparison, high dominance saline vs AVP). Error bars: mean  $\pm$  SEM; dominance measured by average staring durations under saline. **E:** OT and AVP injections increase the cross correlation between M1 and M2 staring (the same as Figure 5E but plotted on a finer time scale). Error bars: mean  $\pm$  SEM. **F:** OT and AVP injections also increase the cross correlation between M2 staring and M1 turning away (the same as Figure 5F but plotted on a finer time scale). Error bars: mean  $\pm$  SEM.

### **Supplementary video**

A brief video clip (~ 1 minute) taken from one experimental session. M1 (D, left) inhaled OT prior to the experiment, whereas M2 (S, right) did not receive any treatment. A variety of behaviors can be identified from the video clip, including (not necessarily in this order) staring, lip-smacking, looking away, turning away, yawning.

**A**

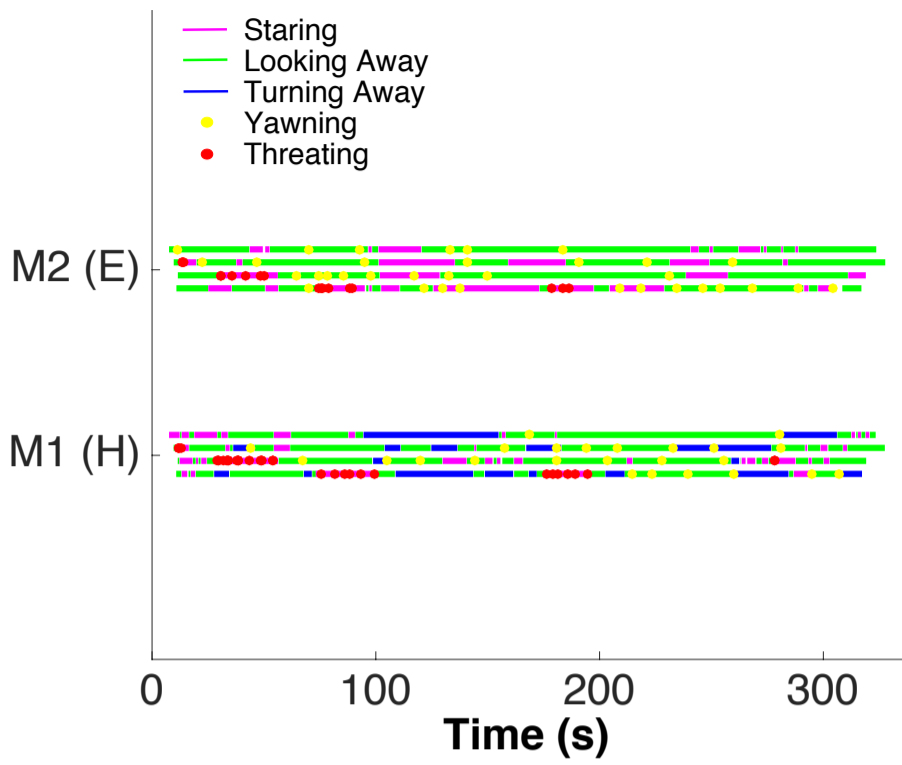

**B**

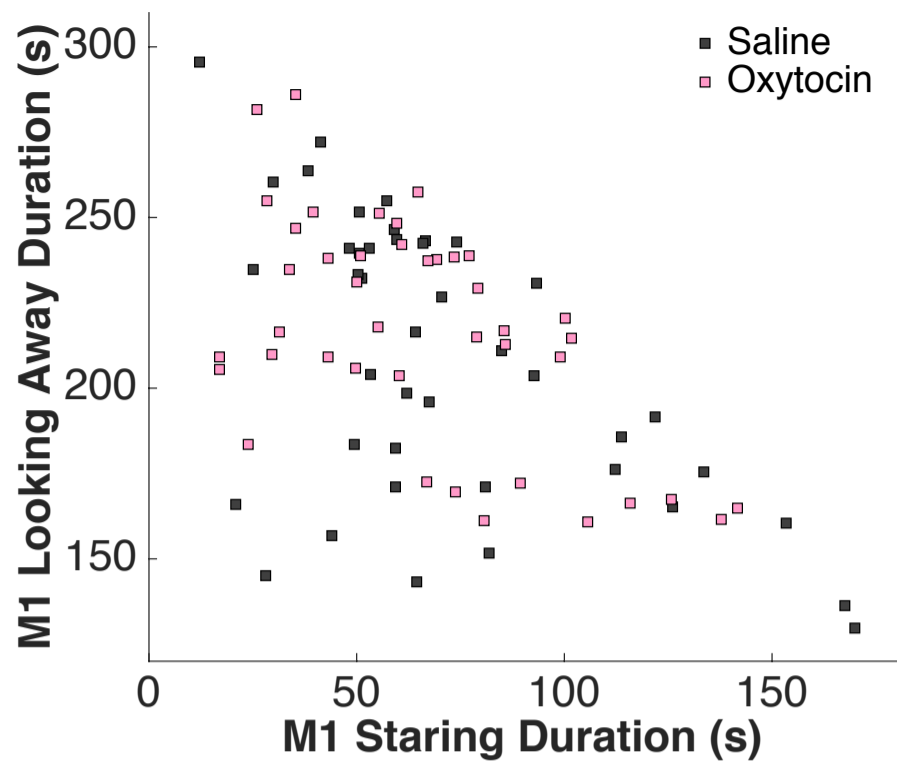

**C**

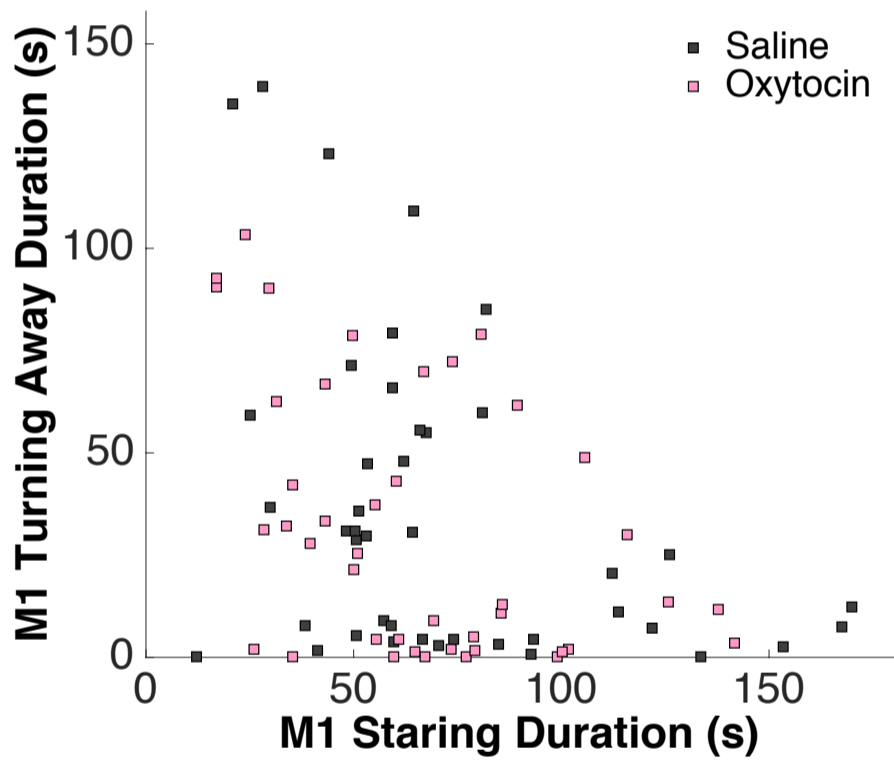

**D**

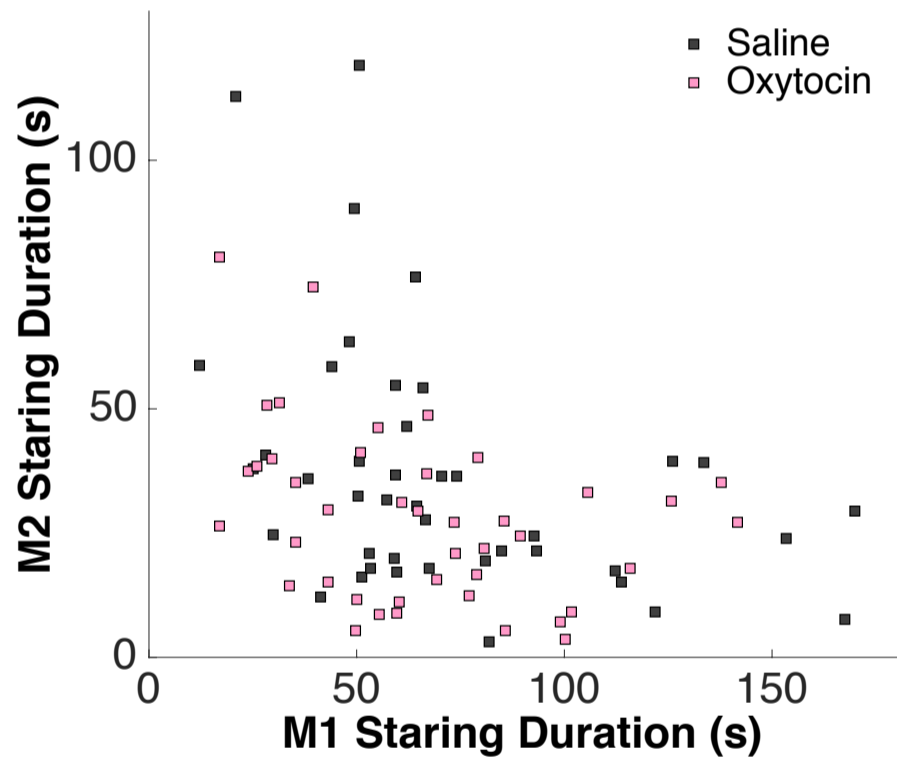

**A**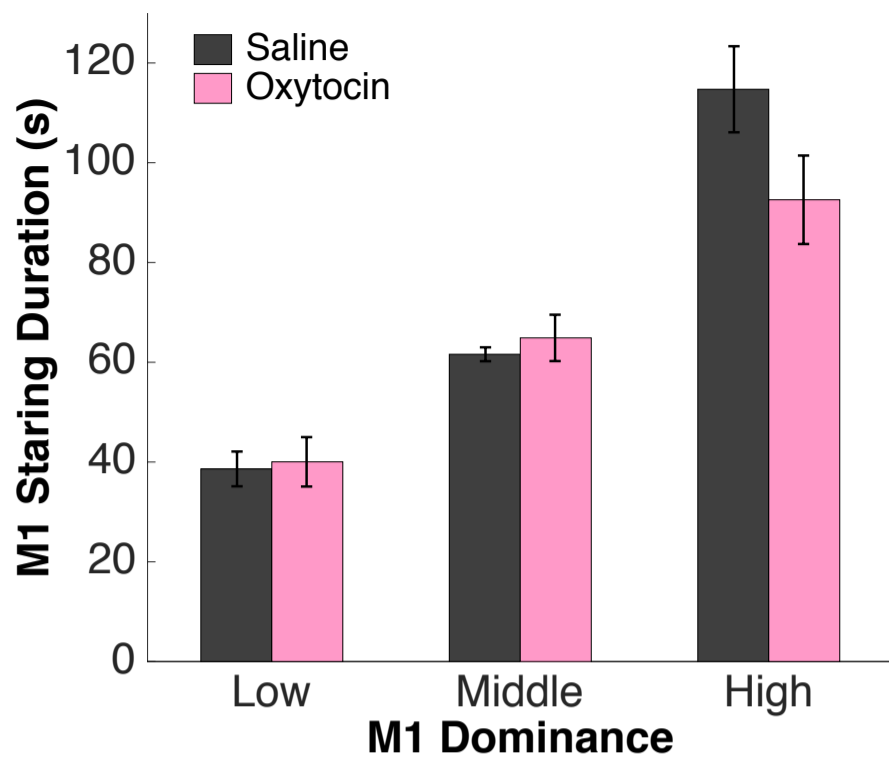**B**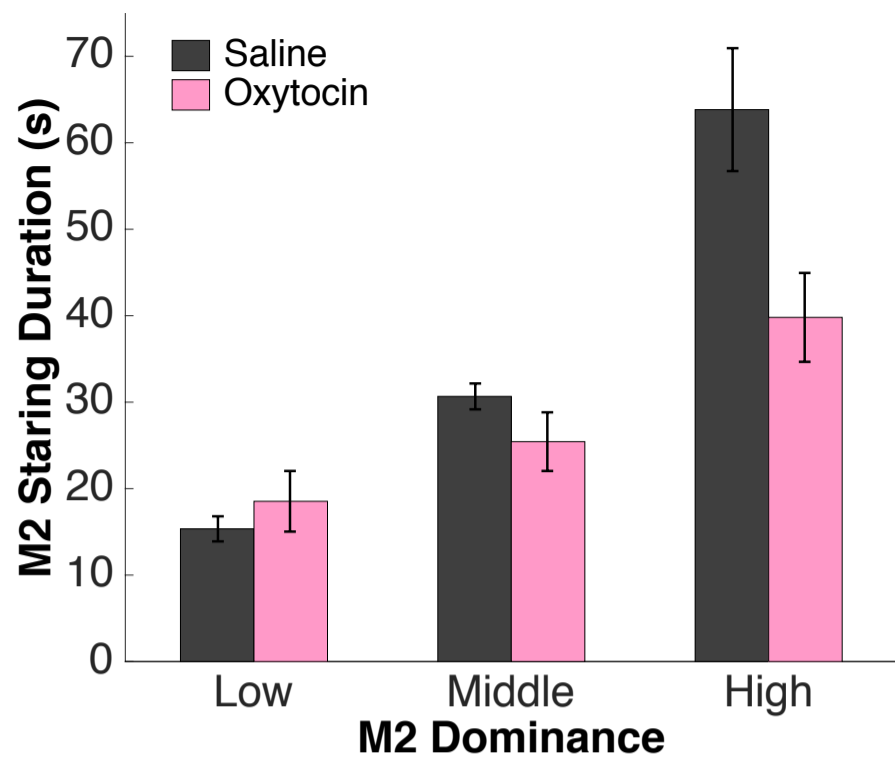**C**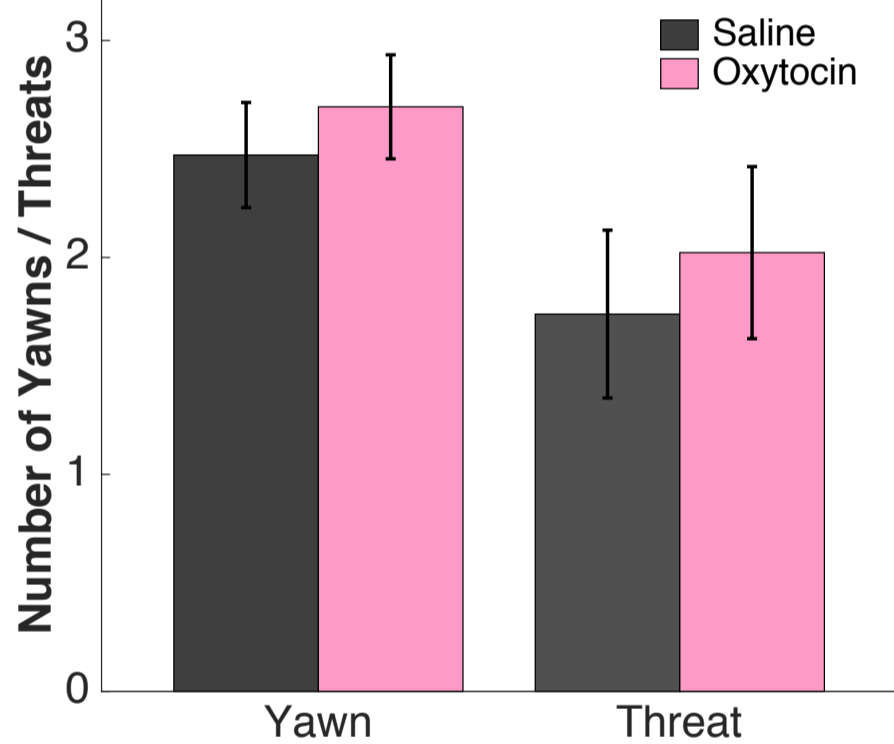**D**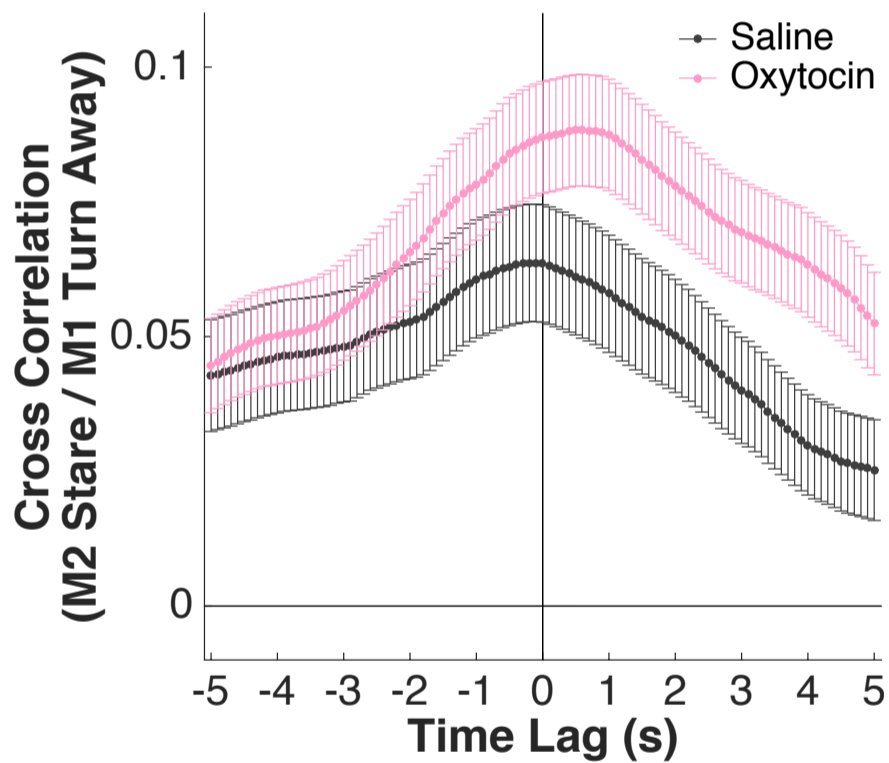**E**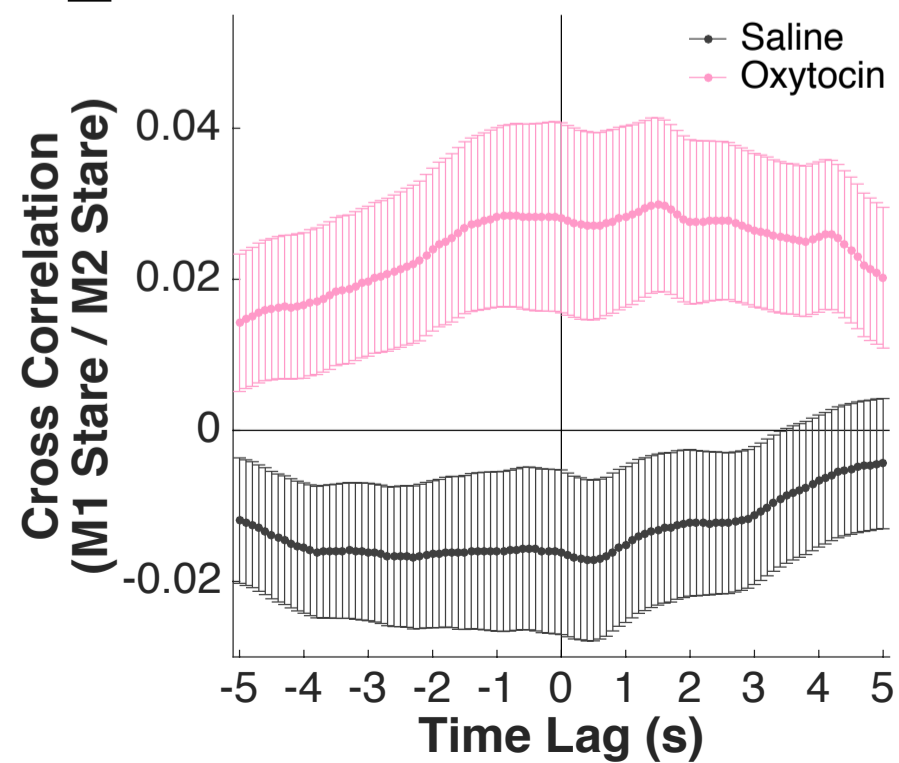**F**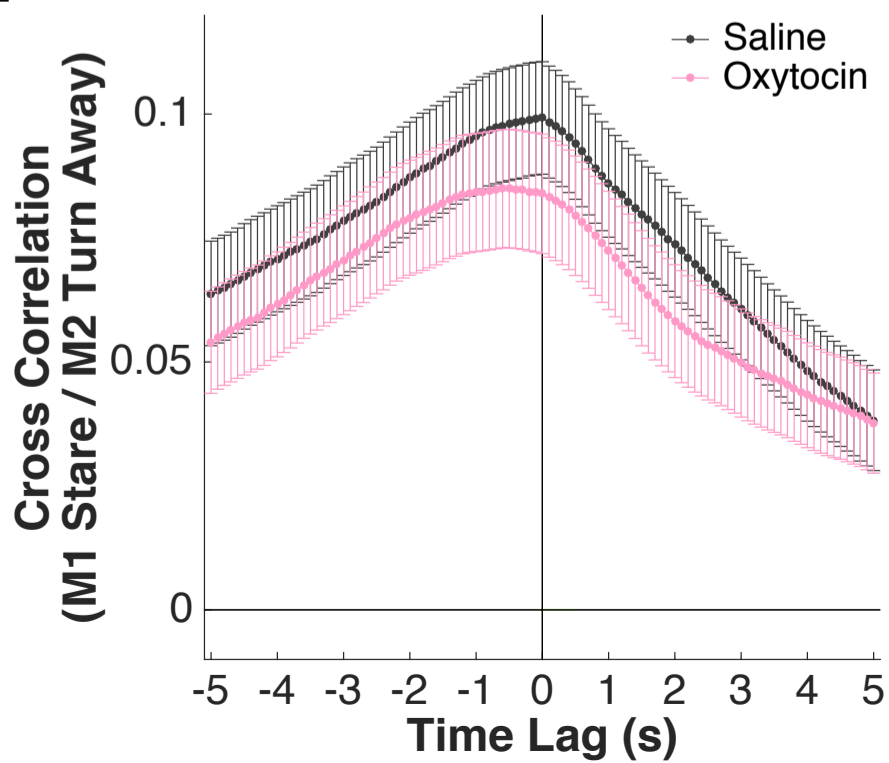

**A**

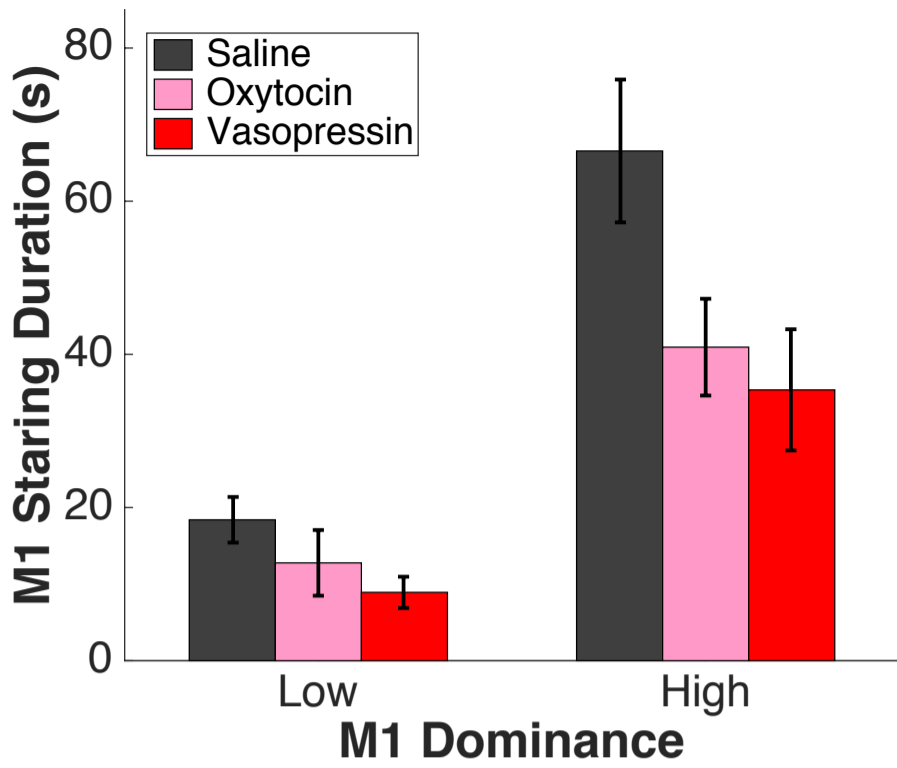

**B**

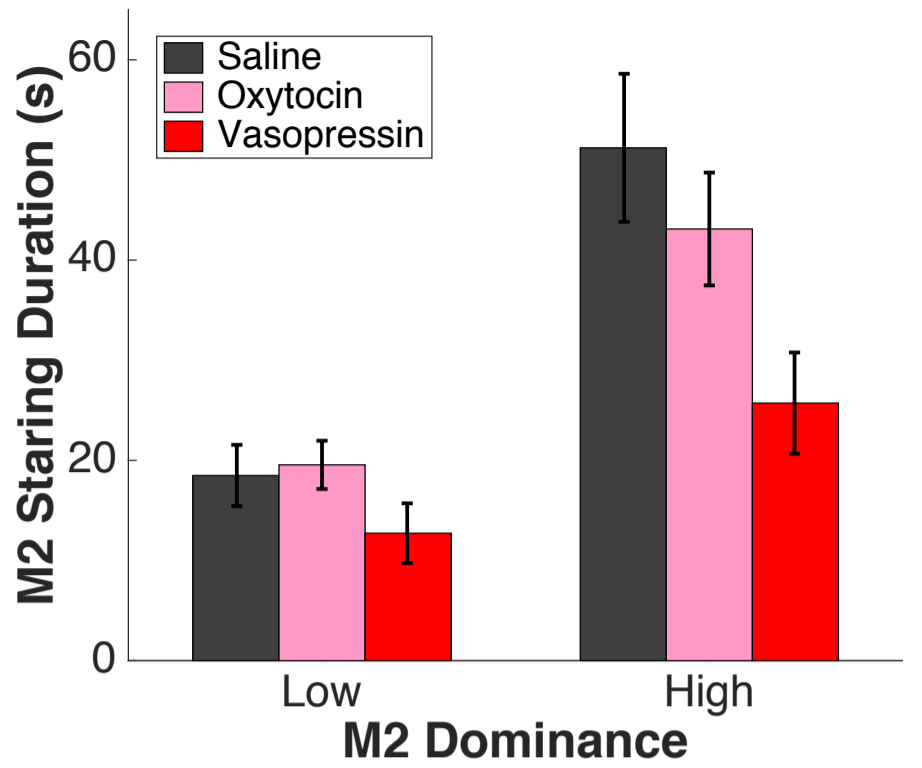

**C**

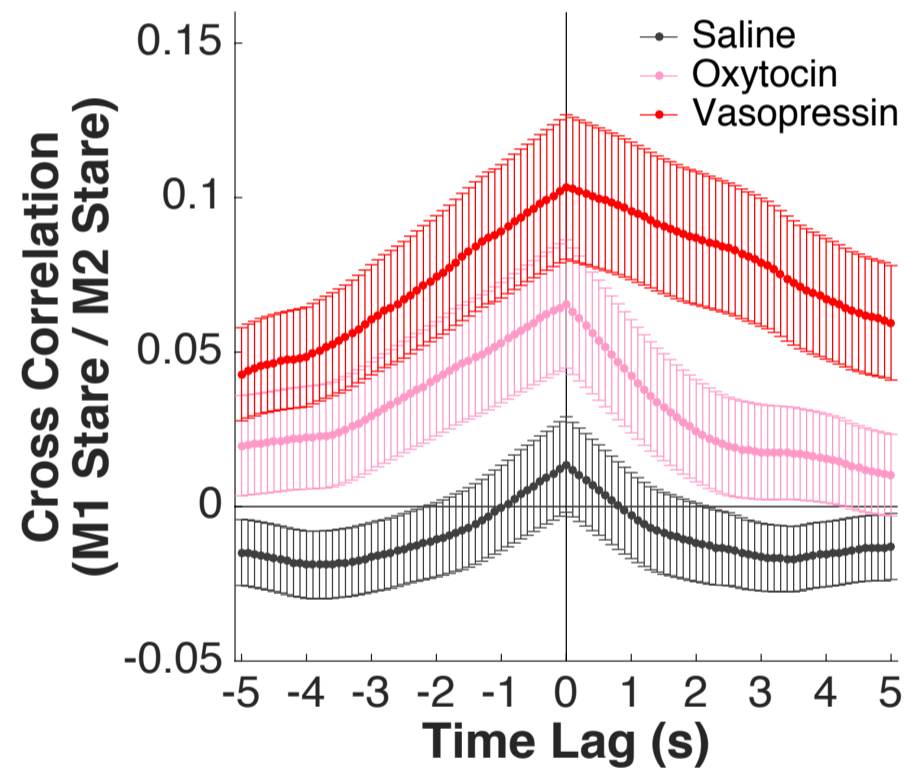

**D**

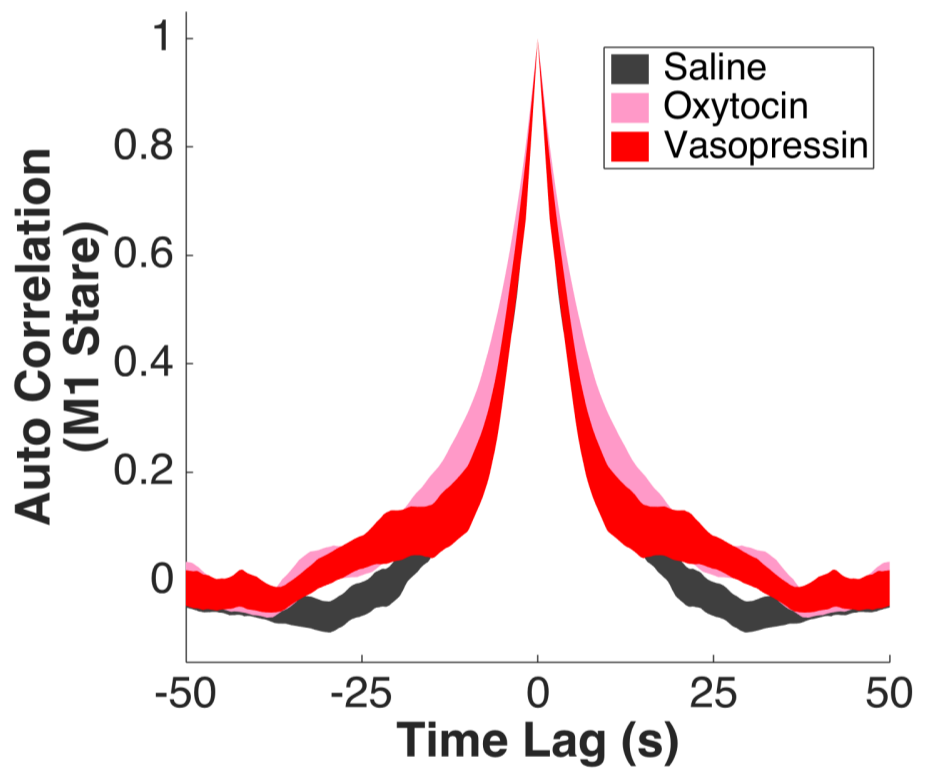

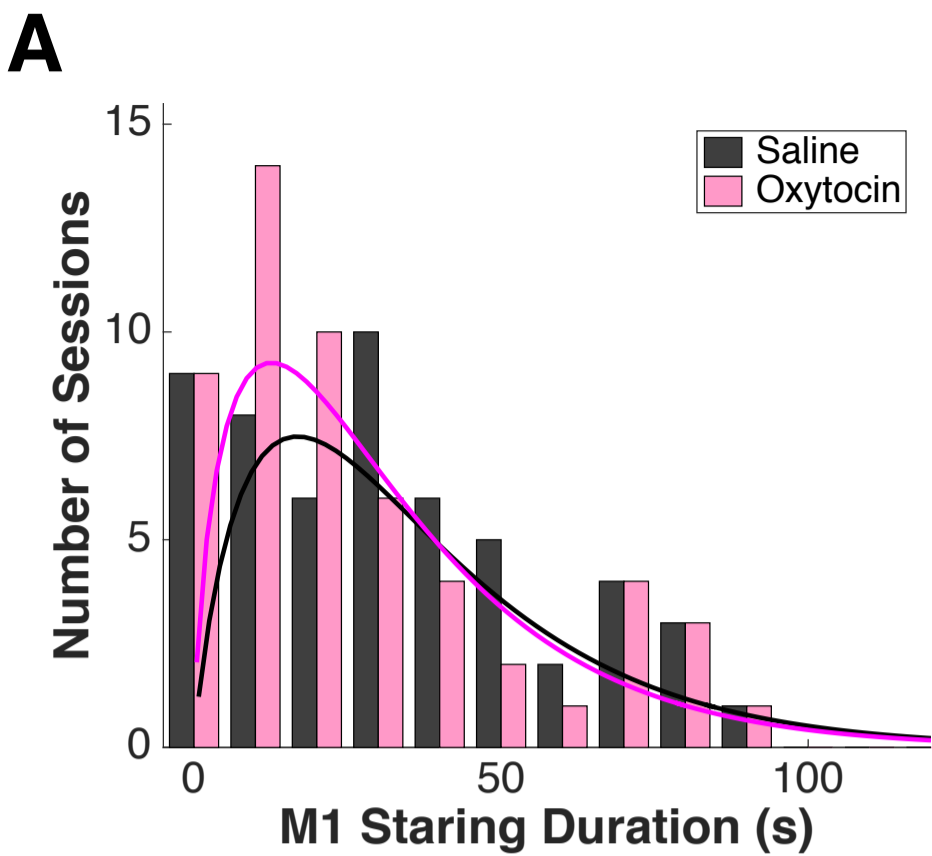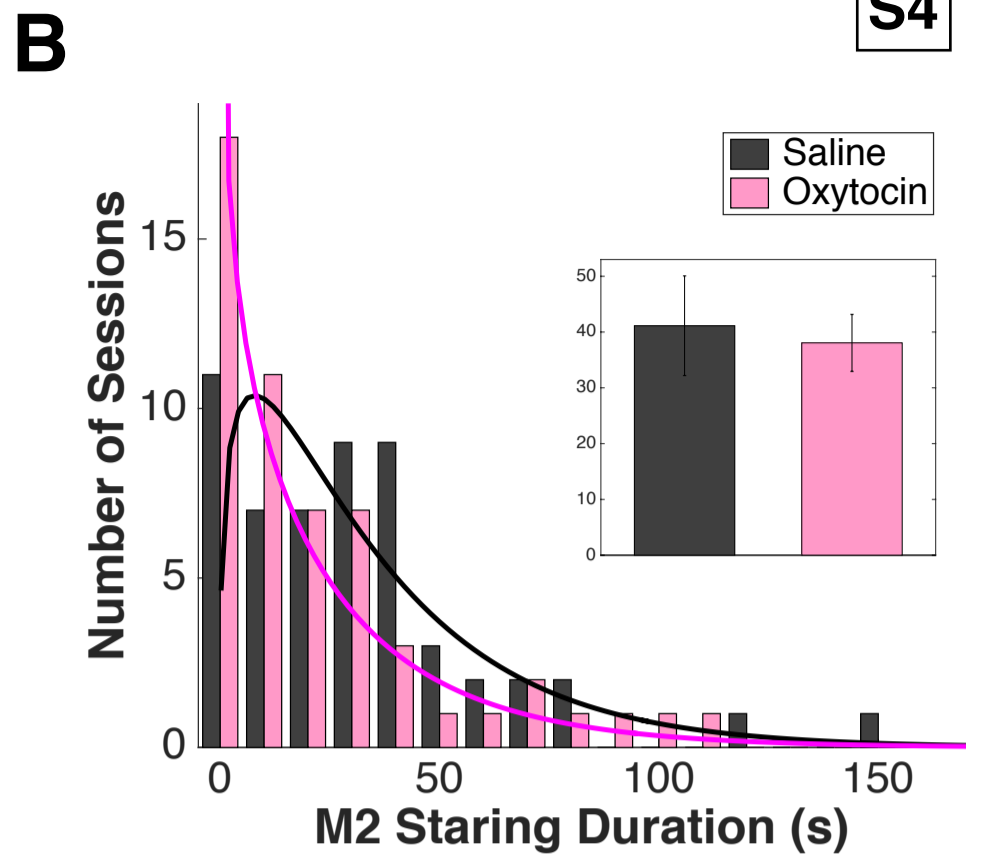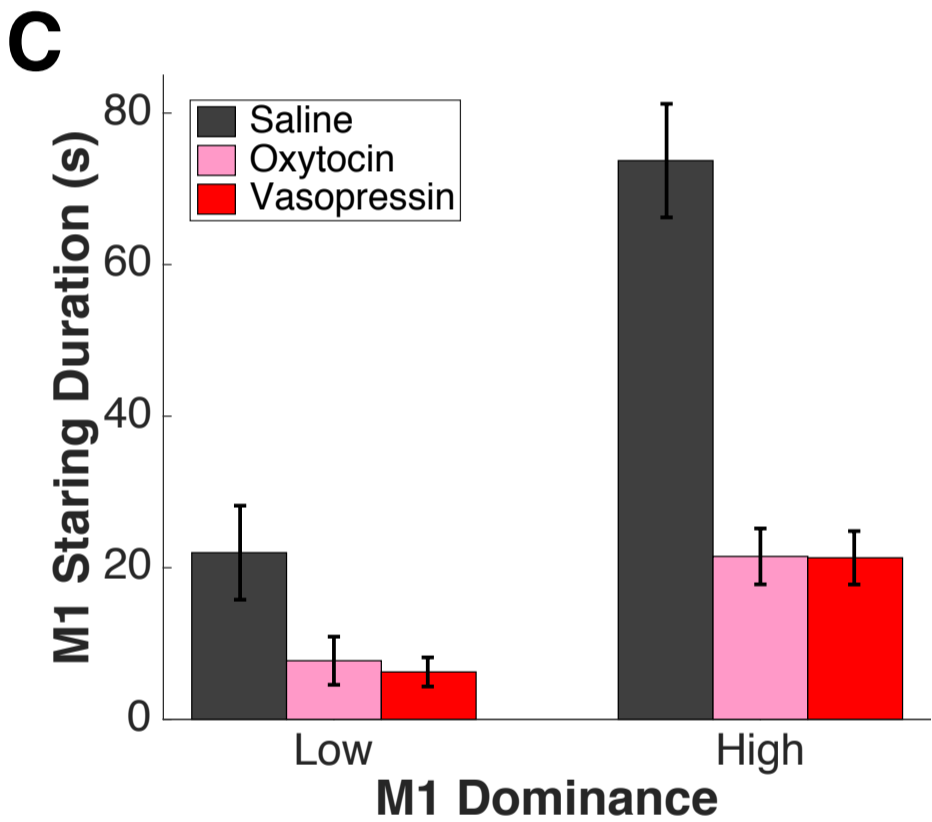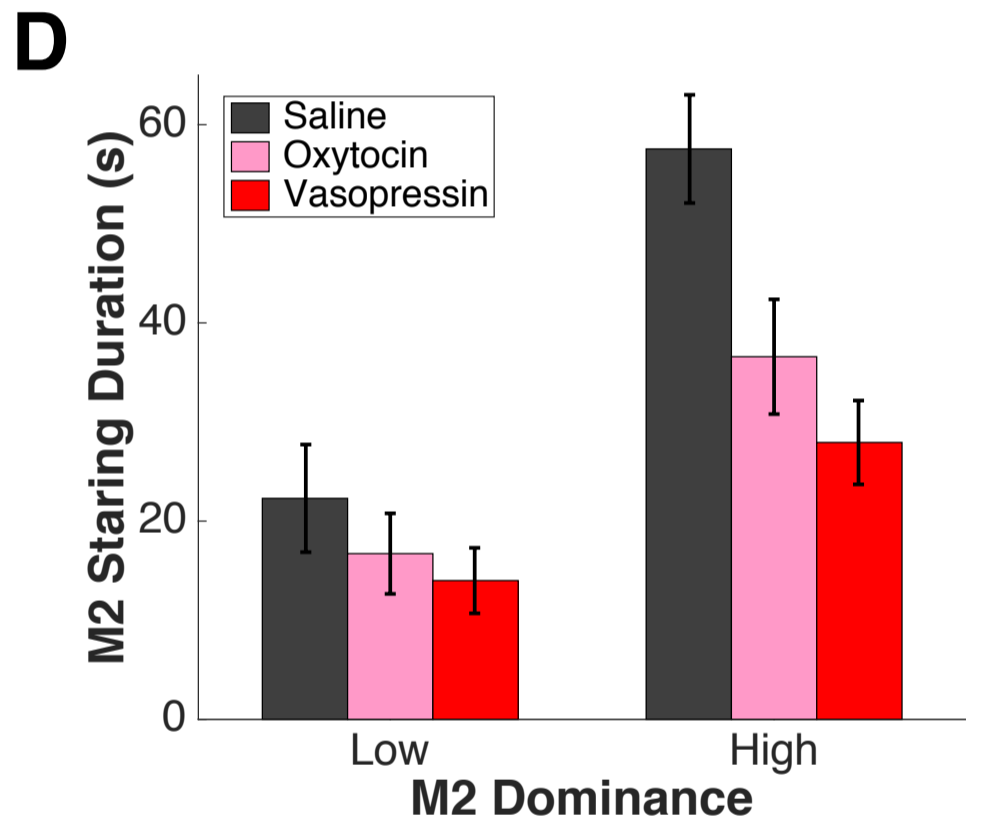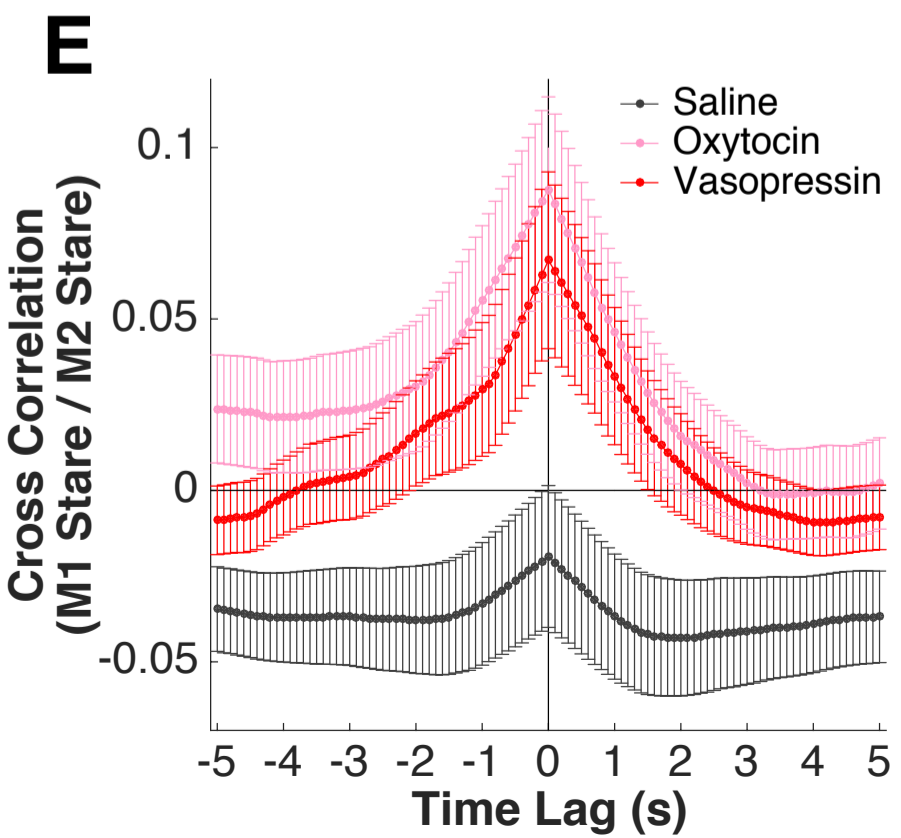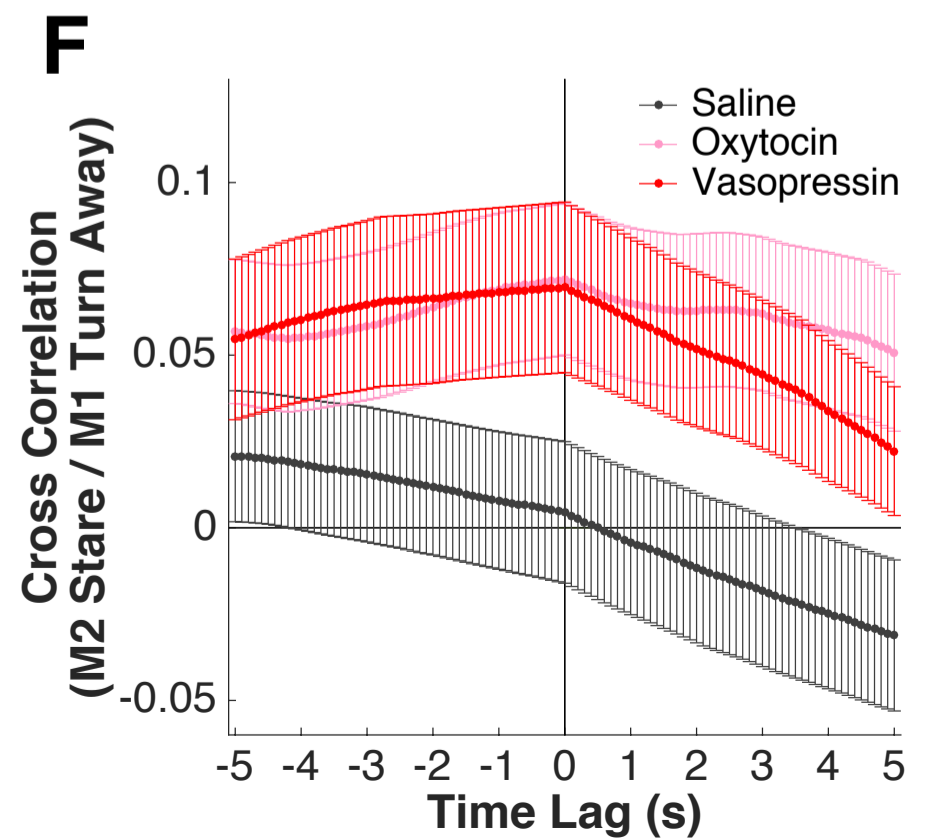

Supplement: 41598_2018_25607_MOESM1_ESM.pdf [file 41598_2018_25607_MOESM1_ESM.pdf]
